# Supplementary material for: Prenatal Trimethyltin Exposure Induces Long-Term DNA Methylation Changes in the Male Mouse Hippocampus
Source: MDPI journal article supplement (doi:10.3390/ijms22158009), 2021-07-27
Supplement: s1 [file s1]

Table S3. PCR Condition

| Study              | Gene          | Primer sequence |                            | PCR condition                                                   |
|--------------------|---------------|-----------------|----------------------------|-----------------------------------------------------------------|
| mtDNA copy numbers | mtDNA         | F               | GCCCATGACCAACATAACTG       | 95 °C for 10 min, 40 cycles at 95 °C for 15 s, 60 °C for 1 min  |
|                    |               | R               | CCTTGACGGCTATGTTGATG       |                                                                 |
|                    | <i>Actb</i>   | F               | GATGCCACAGGATTCCATACCTA    |                                                                 |
|                    |               | R               | AGCCTAGTCCTTTCTCCATCTAAAG  |                                                                 |
| mRNA expression    | <i>Dnmt1</i>  | F               | GAGAACGGAACACACACTCTCACT   | 95 °C for 3 min, 40 cycles at 95 °C for 15 s, 58.2 °C for 1 min |
|                    |               | R               | TATTTGAGTCTGCCATTTCTGCTC   |                                                                 |
|                    | <i>Foxo3</i>  | F               | GCAAGCCGTGTACTGTGGA        |                                                                 |
|                    |               | R               | CCTGGTGAATGCACTGCAGAAGGA   |                                                                 |
|                    | <i>Dnmt3a</i> | F               | GCCGAATTGTGTCTTGGTGGATGACA | 95 °C for 3 min, 40 cycles at 95 °C for 15 s, 56 °C for 1 min   |
|                    |               | R               | CCTGGTGAATGCACTGCAGAAGGA   |                                                                 |
|                    | <i>Snn</i>    | F               | GCCCCTTAGCGCTTTCCTTA       | 95 °C for 3 min, 40 cycles at 95 °C for 15 s, 55 °C for 1 min   |
|                    |               | R               | ACGTGCTTCTGGGCCTATTT       |                                                                 |
|                    | <i>Gapdh</i>  | F               | GAGTCAACGGATTTGGTCGT       | 95 °C for 3 min, 40 cycles at 95 °C for 15 s, 56 °C for 1 min   |
|                    |               | R               | GATCTCGCTCCTGGAAGATG       |                                                                 |
