# Supplementary material for: Prenatal Trimethyltin Exposure Induces Long-Term DNA Methylation Changes in the Male Mouse Hippocampus
Source: MDPI journal article supplement (doi:10.3390/ijms22158009), 2021-07-27
Supplement: s1 [file s1]

Table S1. Two way ANOVA results for TMT treatment, sex and interaction on behavior tests.

| Test            |                | TMT    |         | Sex   |         | TMT & Sex |         |
|-----------------|----------------|--------|---------|-------|---------|-----------|---------|
|                 |                | F      | p-value | F     | p-value | F         | p-value |
| Open Field Test | Distance (cm)  | 1.613  | 0.214   | 1.991 | 0.169   | 1.111     | 0.301   |
|                 | Center (sec)   | 5.891  | 0.022   | 1.859 | 0.183   | 2.292     | 0.141   |
|                 | Corner (sec)   | 13.837 | 0.001   | 6.351 | 0.017   | 5.525     | 0.026   |
|                 | Border (sec)   | 6.696  | 0.015   | 3.771 | 0.062   | 2.722     | 0.11    |
| Y-maze          | Total number   | 0.296  | 0.59    | 0.001 | 0.971   | 3.892     | 0.058   |
|                 | Alteration     | 2.19   | 0.15    | 0.023 | 0.88    | 5.88      | 0.022*  |
|                 | Alteration (%) | 2.948  | 0.097   | 0.316 | 0.578   | 0.665     | 0.421   |

Data were analyzed by two-way ANOVA. \*Tests the null hypothesis that the error variance of the dependent variable is equal across groups.
